# Supplementary material for: Enterococcus faecalis promotes the progression of colorectal cancer via its metabolite: biliverdin
Source: Springer Nature journal article supplement (doi:10.1186/s12967-023-03929-7), 2023-02-02
Supplement: MOESM1 [file 12967_2023_3929_MOESM1_ESM.pdf]

**A**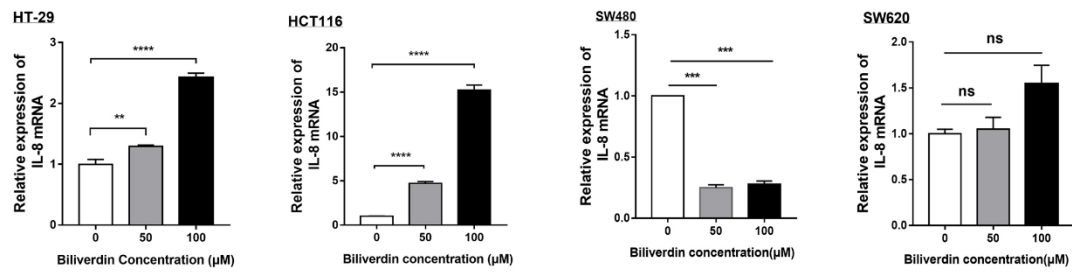**B**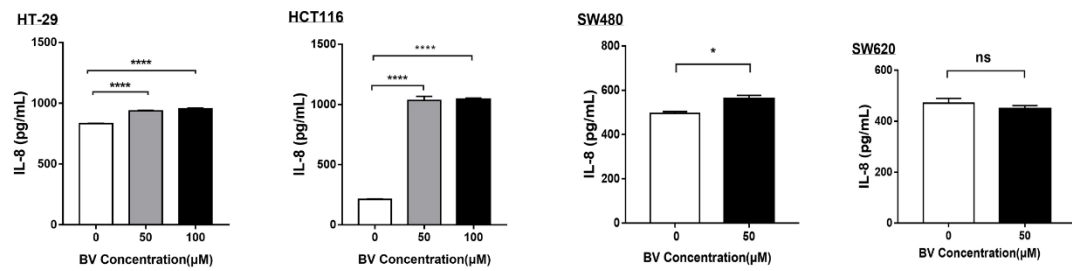**Additional file 1: BV promotes IL-8 secretion in HCT116 and HT-29**

The expression of IL-8 was detected by RT-qPCR and ELISA in HCT116, HT-29, SW480 and SW620 cells cultured with BV.
